# Supplementary material for: Conformation-directing chiral groups in bis(naphthaldiminato)nickel(ii) complexes: a rare example with 16 crystallographically independent units (Z′)
Source: Royal Society of Chemistry journal article supplement (doi:10.1039/c8ce01089g), 2018-01-01
Supplement: c8ce01089g1.pdf [file c8ce01089g1.pdf]

**Conformational-directing chiral groups in bis(naphthaldiminato)nickel(II) complexes. A rare example of 16 crystallographic independent units (Z')**

Maria Luisa Ganadu, Nicola Demitri, Ennio Zangrando

SUPPLEMENTARY MATERIAL

**Table 1S.** Bis(naphthaldiminato)Ni(II) complexes retrieved in CCDC,  $\gamma$  = dihedral angle ( $^{\circ}$ ) between the naphthaldiminate mean planes,  $\theta_1, \theta_2$  = dihedral angles ( $^{\circ}$ ) between ligand and coordination plane  $N_2O_2$

|     | REFCODE  | $\gamma$ complex 1 | $\theta_1, \theta_2$     | $\gamma$ complex 2 | $\theta_1, \theta_2$ |
|-----|----------|--------------------|--------------------------|--------------------|----------------------|
| 1   | NEGQUO   | 0.034              | 22.51, 22.51             |                    |                      |
| 2   | AVOKON   | 0.020              | 28.19, 28.19             |                    |                      |
| 3   | ESAYAA   | 0.040              | 20.36, 20.36             |                    |                      |
| 4   | EXAZIM   | 0.028              | 3.721, 3.721             |                    |                      |
| 5   | FALJEH   | 0.020              | 18.68, 18.68             |                    |                      |
| 6   | FEBVUD   | 0.000              | 1.48, 1.48               |                    |                      |
| 7   | FUMCEX   | 87.822             | tetrahedral conformation |                    |                      |
| 8   | GEJJIP   | 0.000              | 18.01, 18.01             | 0.020              | 23.02, 23.02         |
| 9   | KASYIN   | 0.000              | 3.98, 3.98               |                    |                      |
| 10  | KATVIM   | 0.000              | 15.30, 15.30             |                    |                      |
| 11  | LIHQIE   | 0.000              | 14.82, 14.82             |                    |                      |
| 12  | LIHQIE01 | 0.000              | 17.83, 17.83             |                    |                      |
| 13  | LINZOZ   | 0.020              | 1.77, 1.77               |                    |                      |
| 14  | LINZUF   | 0.028              | 6.15, 6.15               |                    |                      |
| 15  | MOQKOT   | 0.020              | 4.30, 4.30               |                    |                      |
| 16  | NUTJUH   | 0.040              | 2.40, 2.40               |                    |                      |
| 17  | ODAXEX   | 0.028              | 27.60, 27.60             |                    |                      |
| 18  | ODAXEX01 | 0.034              | 3.07, 3.07               |                    |                      |
| 19  | OPEPEG   | 0.028              | 24.67, 24.67             |                    |                      |
| 20  | PANSEE   | 0.000              | 39.57, 39.57             | 0.028              | 23.48, 23.48         |
| 21  | PANSII   | 0.000              | 39.36, 39.36             |                    |                      |
| 22  | PANSOO   | 0.000              | 36.54, 36.54             |                    |                      |
| 23  | PANSUU   | 0.028              | 40.80, 40.80             |                    |                      |
| 24  | PANTAB   | 7.001              | 36.53, 43.35             |                    |                      |
| 25  | PANTEF   | 0.000              | 39.53, 39.53             |                    |                      |
| 26  | PANTIJ   | 0.000              | 2.56, 2.56               |                    |                      |
| 27  | RIWDOQ   | 0.000              | 16.08, 16.08             |                    |                      |
| 28* | RUWLUS   | 41.164             | 21.52, 19.66             | 23.634             | 15.95, 7.99          |
| 29* | RUWMAZ   | 41.322             | 19.84, 21.50             | 23.764             | 16.09, 7.96          |
| 30  | SIPFIG   | 0.028              | 23.04, 23.04             |                    |                      |
| 31  | SIPFIG01 | 0.028              | 16.16, 16.16             |                    |                      |
| 32  | SIPFIG03 | 0.028              | 25.32, 25.32             |                    |                      |
| 33  | SIPFIG04 | 0.000              | 16.36, 16.36             |                    |                      |
| 34  | SIPFIG05 | 17.028             | 14.95, 2.60              | 0.048              | 2.56, 2.56           |
| 35  | TOBTUB   | 0.028              | 30.23, 30.23             |                    |                      |
| 36  | TONHAF   | 0.000              | 1.74, 1.74               | 0.040              | 4.45, 4.45           |
| 37  | TONSOG   | 0.000              | 27.12, 27.12             |                    |                      |
| 38  | TONSOG01 | 88.145             | tetrahedral conformation |                    |                      |
| 39  | TONSOG02 | 0.028              | 27.12, 27.12             |                    |                      |
| 40  | UNOJOX   | 0.028              | 23.17, 23.17             |                    |                      |
| 41  | UNOJOX01 | 0.020              | 23.16, 23.16             |                    |                      |
| 42  | VAJWIP   | 0.028              | 3.00, 3.00               | 0.000              | 17.98, 17.98         |
| 43  | YALBAO   | 0.040              | 17.98, 17.98             |                    |                      |
| 44  | YOWPIJ   | 0.028              | 6.04, 6.04               | 0.000              | 12.20, 12.20         |
| 45  | YOXWIS   | 0.020              | 38.98, 38.98             |                    |                      |
| 46  | YOXWIS01 | 5.307              | 39.32, 36.89             |                    |                      |
| 47  | ZUZQOA   | 0.000              | 13.15, 13.15             |                    |                      |

\* imino N atom bearing a chiral R group

**Table 2S.**Coordination bond distances (Å) for the 16 independent complexes of **2**

|                                                            |            |                                                            |            |
|------------------------------------------------------------|------------|------------------------------------------------------------|------------|
| Ni1-O1                                                     | 1.8522(10) | Ni1-N2                                                     | 1.8841(12) |
| Ni1-O2                                                     | 1.8575(10) | Ni1-N1                                                     | 1.8861(12) |
| Ni2-O3                                                     | 1.8538(10) | Ni2-N4                                                     | 1.8875(12) |
| Ni2-O4                                                     | 1.8544(10) | Ni2-N3                                                     | 1.8963(12) |
| Ni3-O6                                                     | 1.8553(10) | Ni3-N6                                                     | 1.8818(12) |
| Ni3-O5                                                     | 1.8593(10) | Ni3-N5                                                     | 1.8971(12) |
| Ni4-O8                                                     | 1.8507(10) | Ni4-N8                                                     | 1.8901(12) |
| Ni4-O7                                                     | 1.8565(10) | Ni4-N7                                                     | 1.9038(12) |
| Ni5-O9                                                     | 1.8557(10) | Ni5-N10                                                    | 1.8842(12) |
| Ni5-O10                                                    | 1.8560(10) | Ni5-N9                                                     | 1.8931(12) |
| Ni6-O11                                                    | 1.8530(10) | Ni6-N12                                                    | 1.8854(12) |
| Ni6-O12                                                    | 1.8552(10) | Ni6-N11                                                    | 1.9025(12) |
| Ni7-O14                                                    | 1.8514(11) | Ni7-N14                                                    | 1.8903(13) |
| Ni7-O13                                                    | 1.8517(11) | Ni7-N13                                                    | 1.8988(13) |
| Ni8-O16                                                    | 1.8549(10) | Ni8-N16                                                    | 1.8835(12) |
| Ni8-O15                                                    | 1.8578(10) | Ni8-N15                                                    | 1.8979(12) |
| Ni9-O18                                                    | 1.8541(10) | Ni9-N17                                                    | 1.8856(12) |
| Ni9-O17                                                    | 1.8569(10) | Ni9-N18                                                    | 1.8963(12) |
| Ni10-O19                                                   | 1.8532(10) | Ni10-N19                                                   | 1.8889(12) |
| Ni10-O20                                                   | 1.8533(10) | Ni10-N20                                                   | 1.8967(12) |
| Ni11-O21                                                   | 1.8532(10) | Ni11-N21                                                   | 1.8873(12) |
| Ni11-O22                                                   | 1.8553(10) | Ni11-N22                                                   | 1.9028(12) |
| Ni12-O24                                                   | 1.8504(10) | Ni12-N23                                                   | 1.8831(12) |
| Ni12-O23                                                   | 1.8559(11) | Ni12-N24                                                   | 1.8842(12) |
| Ni13-O25                                                   | 1.8544(11) | Ni13-N25                                                   | 1.8847(12) |
| Ni13-O26                                                   | 1.8553(10) | Ni13-N26                                                   | 1.8960(12) |
| Ni14-O27                                                   | 1.8495(11) | Ni14-N27                                                   | 1.8830(13) |
| Ni14-O28                                                   | 1.8582(10) | Ni14-N28                                                   | 1.9013(13) |
| Ni15-O29                                                   | 1.8523(10) | Ni15-N29                                                   | 1.8895(12) |
| Ni15-O30                                                   | 1.8530(10) | Ni15-N30                                                   | 1.8986(12) |
| Ni16-O32                                                   | 1.8478(10) | Ni16-N31                                                   | 1.8806(12) |
| Ni16-O31                                                   | 1.8571(10) | Ni16-N32                                                   | 1.8845(12) |
|                                                            |            |                                                            |            |
| Range from 1.8478(10) (Ni16-O32)<br>to 1.8593(10) (Ni3-O5) |            | Range from 1.8806(12) (Ni16-N31)<br>to 1.9038(12) (Ni4-N7) |            |
| Mean value 1.854                                           |            | Mean value 1.891                                           |            |

**Table 3S.** Dihedral angles ( $^{\circ}$ ) between naphthaldiminate mean planes ( $\gamma$ ) and between each naphthaldiminate with  $N_2O_2$  donor set ( $\theta$ )

| $\gamma$ ligand1/ligand2 | $\theta_1$ lig1/coord-plane               | $\theta_2$ lig2/coord-plane |
|--------------------------|-------------------------------------------|-----------------------------|
| <b>Complex 1</b>         |                                           |                             |
| 1.69(6)                  | 26.92(6)                                  | 27.31(6)                    |
| <b>Complex 2</b>         |                                           |                             |
| 87.71(4)                 | 43.18(4)                                  | 44.63(4)                    |
| 88.56(4)                 | 46.08(4)                                  | 42.55(4)                    |
| 86.27(4)                 | 52.54(4)                                  | 41.58(4)                    |
| 87.47(4)                 | 53.08(4)                                  | 39.72(4)                    |
| 88.85(4)                 | 46.20(4)                                  | 42.86(4)                    |
| 87.37(4)                 | 46.80(4)                                  | 40.70(4)                    |
| 89.92(4)                 | 47.73(4)                                  | 42.43(4)                    |
| 85.97(4)                 | 53.01(4)                                  | 41.30(4)                    |
| 89.47(4)                 | 41.77(4)                                  | 47.85(4)                    |
| 88.29(4)                 | 41.63(4)                                  | 46.83(4)                    |
| 88.61(4)                 | 40.11(4)                                  | 51.49(4)                    |
| 89.36(4)                 | 44.84(4)                                  | 44.56(4)                    |
| 87.07(4)                 | 40.36(4)                                  | 46.75(4)                    |
| 72.31(4)                 | 41.04(5)                                  | 31.66(4)                    |
| 69.52(4)                 | 36.56(5)                                  | 33.10(4)                    |
| 65.21(4)                 | 31.76(5)                                  | 33.51(4)                    |
| Mean = 84.50             | Mean = 43.07<br>Range 31.66(4) - 53.08(4) |                             |
